# Supplementary material for: A toxin antitoxin system promotes the maintenance of the IncA/C-mobilizable Salmonella Genomic Island 1
Source: PubMed Central journal article supplement (PMC5006074; doi:10.1038/srep32285), 2016-08-31
Supplement: srep32285-s1.pdf [file srep32285-s1.pdf]

# **A toxin antitoxin system promotes the maintenance of the IncA/C-mobilizable *Salmonella* Genomic Island 1**

Kevin T. Huguet<sup>1,2</sup>, Mathieu Gonnet<sup>1,2</sup>, Benoît Doublet<sup>1,2</sup>, and Axel Cloeckaert<sup>1,2</sup>

<sup>1</sup> INRA, UMR1282, Infectiologie et Santé Publique, F-37380 Nouzilly, France

<sup>2</sup> Université François Rabelais de Tours, UMR1282 Infectiologie et Santé Publique, F-37000  
Tours, France

Corresponding author: Axel Cloeckaert (email: [Axel.Cloeckaert@tours.inra.fr](mailto:Axel.Cloeckaert@tours.inra.fr))

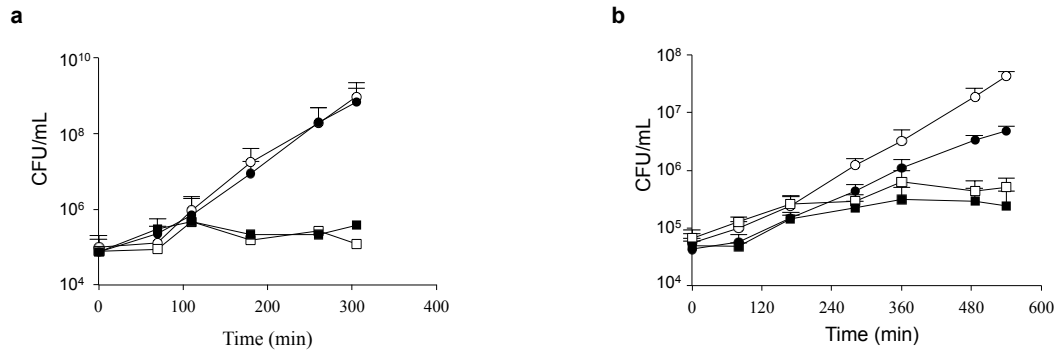

**Supplementary Figure 1.** Post segregational killing assays in *E. coli* TOP10.

(a) Curves with empty symbols represent growth of *E. coli* carrying the pMLO59 replication-thermosensitive vector (spectinomycin resistance) cultured in RM medium at 42 °C. Curves with filled symbols represents growth of *E. coli* carrying pKH03 (pMLO59 containing the putative operon S026-S025 under the control of its own putative promoter) cultured in RM medium at 42 °C. Viability (CFU/ml) was monitored for 300 min. by plating serial dilutions on LB agar with (squares) or without (circles) spectinomycin. (b) Curves with empty symbols represent growth of *E. coli* carrying pMLO59 empty vector cultured in RM medium at 42 °C supplemented with 2.5 % arabinose. Curves with filled symbols represents growth of *E. coli* carrying pKH04 (pMLO59 containing S026-S025 under the control of the P<sup>ARA</sup> promoter) cultured in RM medium at 42 °C supplemented with 2.5 % arabinose. Viability (CFU/ml) was monitored for 540 min. by plating serial dilutions on LB agar with (squares) or without (circles) spectinomycin and incubated at 30°C. Values correspond to the mean of three independent experiments.

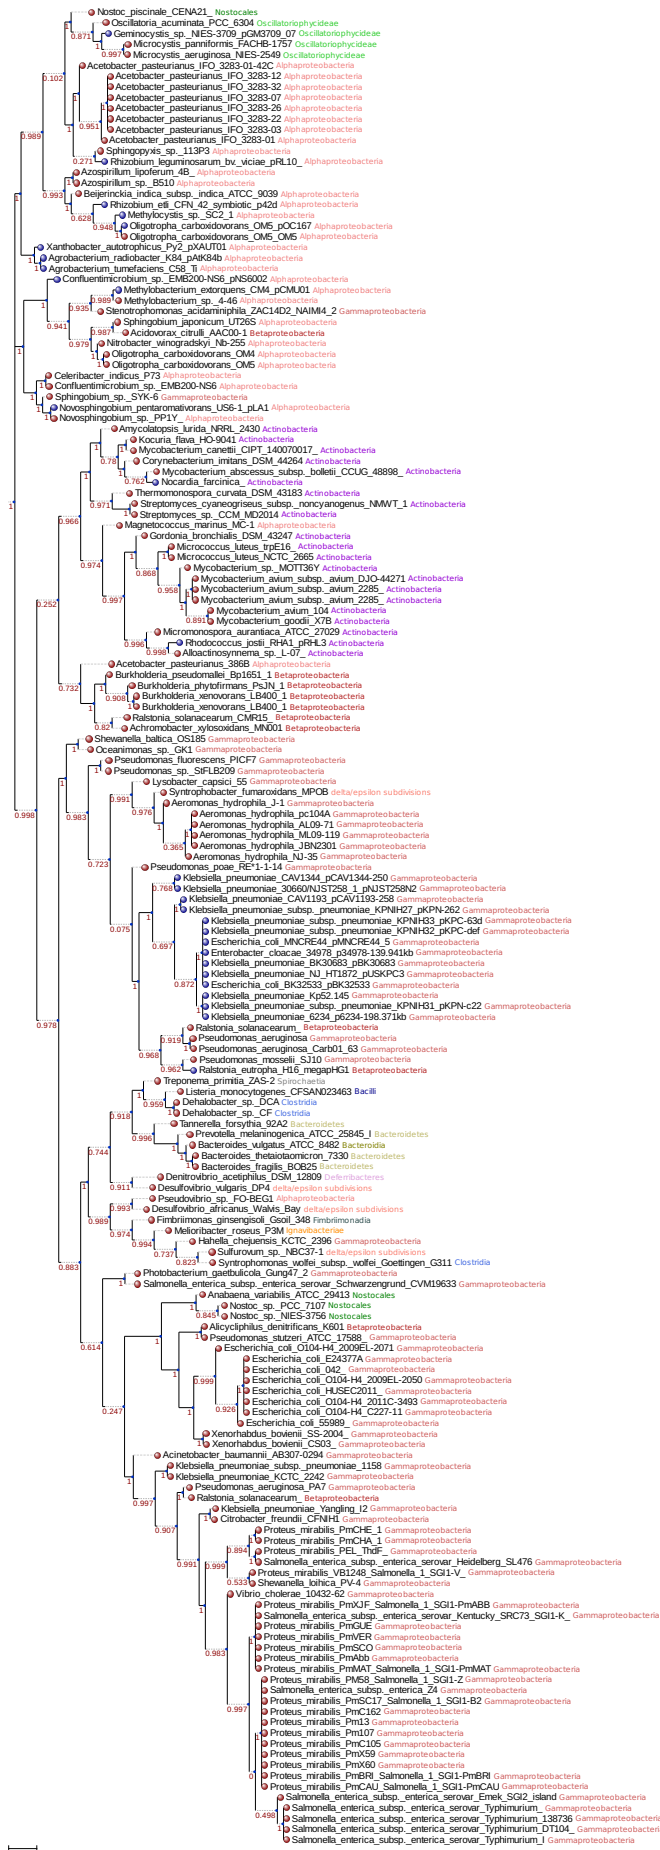

**Supplementary Figure 2.** Maximum-Likelihood phylogenetic tree of S025-S026 homologous protein sequences concatenation. Leaves are labeled with strain names, phyla and a pellet determining the type of replicon: blue for a plasmid and red for a genomic island. Internal nodes are labeled with the bootstrap value.

**Supplementary Table 1.** Sequences of the primers used in this study.

| Primer                                  | Séquence (5'-3') <sup>§</sup>                                              | Position in SGI1 (GenBank accession no. AF261825) |
|-----------------------------------------|----------------------------------------------------------------------------|---------------------------------------------------|
| <i>Cloning</i>                          |                                                                            |                                                   |
| Fw5'-S025-SacI                          | GAGCTCAGGAGGATTATATGGTTTCTAAAAG                                            | 24879-24897                                       |
| Rv3'-S025-XbaI                          | AGTCTTCTAGATCAAGTTACAATTTCTAT                                              | 22349-22366                                       |
| Fw5'-S026-EcoRI                         | TTGTGAATTCAATGGCTACTGCGGAACA                                               | 25886-25903                                       |
| Rv3'-S026-PstI                          | AGTCTCTGCAGTTATTTGTTATTACCTGACTGC                                          | 24913-24934                                       |
| FwS026-S025                             | GGTTCTATTCCTGTATCTGA                                                       | 26066-26085                                       |
| RvS026-S025                             | AGTGTCAGTTCTATTGGTTC                                                       | 22204-22223                                       |
| FwS026-S025-KpnI                        | TCGAGGTACCTGGTAAAGTTGCCCGTCTT                                              | 25917-25936                                       |
| RvS026-S025-SaI                         | GTCAGTCGACAGTGTTCAGTTCTATTGGTTC                                            | 22204-22223                                       |
| <i>Control</i>                          |                                                                            |                                                   |
| U7-L12                                  | ACACCTTGAGCAGGGCAAAG                                                       | 1-20                                              |
| LJ-R1                                   | AGTTCTAAAGGTTTCGTAGTCG                                                     | 480-500                                           |
| Fw-A/C                                  | GAGAACCAAAGACAAAGACCTGGA                                                   | NA                                                |
| Rv-A/C                                  | ACGACAAACCTGAATTGCCTCCTT                                                   | NA                                                |
| FwpBAD                                  | ATGCCATAGCATTTTTATCC                                                       | NA                                                |
| RvpBAD                                  | GATTTAATCTGTATCAGG                                                         | NA                                                |
| FwM13                                   | GTAAAACGACGGCCAGT                                                          | NA                                                |
| RvM13                                   | AACAGCTATGACCATG                                                           | NA                                                |
| <i>Construction of deletion mutants</i> |                                                                            |                                                   |
| FwΔS026-S025                            | TCAAGTTACAATTTCTATTGCGACCTGATTTTCTATT<br>GCAACTTCAATCTGTGTAGGCTGGAGCTGCTTC | 22349-22398                                       |
| FwΔS026                                 | CACATCTAAATGCTTCCTTTTAGAAACCATATAATTC<br>CCTTATATACTTTGTGTAGGCTGGAGCTGCTTC | 24863-24912                                       |
| RvΔS026-S025                            | CTTTATTGTATAAAAATTGGTAAAGTTGCCCGTCTTA<br>TGGAGATTGAATACATATGAATATCCTCCTTAG | 25903-25952                                       |

|         |                                                                            |             |
|---------|----------------------------------------------------------------------------|-------------|
| RvΔS025 | TTCTAGAAGGCAGTCAGGTAATAACAAATAAAAAGT<br>ATATAAGGAATTATCATATGAATATCCTCCTTAG | 24893-24943 |
|---------|----------------------------------------------------------------------------|-------------|

*qPCR primers*

|                         |                           |             |
|-------------------------|---------------------------|-------------|
| Fwq71276.1 <sup>¥</sup> | ATGCCACCCTTTACACCCTG      | NA          |
| Rvq71277.1 <sup>¥</sup> | CTGTTGAGTCTGAGGTTGCG      | NA          |
| FwqattB <sup>£</sup>    | TACCTCCGACGACCTACTGG      | NA          |
| RvqattB <sup>£</sup>    | ATCCGGCTTACGGGTTTTG       | NA          |
| FwqattP <sup>+</sup>    | CGGATGAAGATCAGGGAGAA      | 42441-42460 |
| RvqattP <sup>+</sup>    | GGTTGTTTTGATATGTTTTGAAAGG | 196-220     |
| FwqS024                 | TGACTGAAATGGGGAGCAAC      | 21964-21983 |
| RvqS024                 | CCGAAGAAAGGCAGTTATGG      | 22038-22057 |
| FwqLeft-J               | TGGGACGGATTTTCTCCAG       | 126-144     |
| RvqLeft-J               | CGGAGCAAAATCGTGAGAAG      | 275-294     |
| FwqA/C                  | TACACGCCATCGCTTATCAG      | NA          |
| RvqA/C                  | CTGCTTACGCTTGTTGGACG      | NA          |

---

<sup>§</sup> *Italic letters represent artificially added restriction sites or priming sites of pKD4.*

<sup>¥</sup> To determine chromosomal DNA copy number (GenBank accession no. NC\_011149.1)

<sup>£</sup> To determine the SGI1-free attB sites copy number

<sup>+</sup> To determine the copy number of excised SGI1

NA, not applicable
